# Supplementary material
Source: publisher figshare collection journal article supplement (https://geolsoc.figshare.com/ndownloader/files/14358593)
Supplement: Supplementary file 1 [file 14358593]

## Sheet: Sheet1
Table S13 Sandstone chemistry ch. 10 Upukerora Fm. ICP-MS
Sample name	NZ13-104	NZ13-105	NZ13-106	N14-58	NZ13-74	N14 57	N14-57	N14-58	N14-59	N14-60	N14-62	N14-65	N14-112	N14-115	N14-119	NZ14-141
Rock type	sandstone matrix	sandstone matrix	med. Sandstone	med. Sandstone	granular matrix	med. Sandstone	med. Sandstone	med. Sandstone	fine sandstone	med. Sandstone	med. Sandstone	med. Sandstone	med. Sandstone	med. Sandstone	med. Sandstone	med. sandstone
Region	Baldhill, Southland	Baldhill, Southland	Baldhill, Southland	Gyzeh, Southland	Westdome, Southland	Gyzeh, Southland	Gyzeh, Southland	Gyzeh, Southland	Gyzeh, Southland	Gyzeh, Southland	Gyzeh, Southland	Gyzeh, Southland	Westdome, Southland	Westdome, Southland	Baldhill, Southland	Baldhill, Southland
GPS	S45 38242 E168 10148	S45 38192 E168 10249	S45 38189 E168 10249	E21 44169 N55 04038	S45 58872 E168 20054		E21 44077 N55 03993	E21 44169 N55 04038	E21 44166 N55 04071	E21 44204 N55 04105	E21 44485 N55 03973	E21 44544 N55 03945	E21 34729 N55 03089	E21 33259 N55 06596	E21 26565 N55 24847	E21 26043 N55 24739
Ba	72	50	46	260	202	109	167	416	933	39	230	30	60	112	117	178
Be	1	2	2	1	1	2	1	3	1	1	1	2	1	1	1	1
Co	39.1	33	31.9	23.6	41.3	63.7	43.1	32.8	30.8	44.9	23.9	62.4	34.8	27.2	28	52.6
Cs	0.4	0.5	0.2	1.4	1.1	0.1	1	2.2	1.3	0.1	2.1	0.1	0.5	1.8	0.4	0.1
Ga	10.4	14.9	13.9	12.6	16.4	14.3	16.7	16.4	16.1	15	17.6	12.2	19.1	18.2	16.8	17
Hf	1.2	1.7	2	4.1	2	1.5	2.4	3.7	2.2	1.2	3.2	2.4	2.9	2.9	2.5	1.3
Nb	0.6	1.1	1	5	1.4	0.9	2.8	5.1	1.9	0.4	3.7	1.3	2.1	3.5	1	0.3
Rb	21	11.4	3.4	39.2	18.4	2.8	18.7	54	30.5	2	37.8	2.4	10.5	16.9	23.1	15.9
Sn	1	1	1	2	1	1	1	2	1	1	1	1	1	1	1	1
Sr	230	221.5	147.7	210.6	287.1	273.7	407.5	284.2	561.7	132.2	338.9	154.2	212.1	325.9	387	81.7
Ta	2.1	1.1	1	2.2	0.7	4.4	2.4	2	2.1	1.1	0.7	1.7	0.2	0.3	0.1	0.1
Th	0.2	0.3	0.2	5.5	0.8	0.3	1.9	5.2	1.9	0.2	4.4	0.4	0.9	1.7	0.4	0.2
U	0.1	0.1	0.2	1.4	3.2	0.1	0.5	1.4	0.7	0.1	1.4	0.2	0.3	0.6	0.4	0.1
V	252	284	283	98	408	337	239	152	116	254	165	445	242	223	374	260
W	129.5	63	87.9	189.8	45.8	298.7	166.8	100.9	163	100.3	43.9	150.7	36.9	16.3	41.4	26.7
Zr	37	61.6	66.8	161.4	70.6	51	86.3	139.4	75.5	39.6	125.2	82.1	108	112.8	83.8	40.4
Y	14.6	18.6	25.9	18.7	15.7	17.3	17.8	17.5	16.8	15.6	26.5	20.6	23.8	26.8	25.3	15.4
La	2.1	5.1	3.9	19.7	6	3	8	15	9.2	2.3	13.8	5.1	8.5	9.4	5	1.9
Ce	5.3	13.4	10.4	37.5	14.7	7.5	19.9	32.3	21.3	6.8	30.8	15.5	20.4	23.1	16.2	5.6
Pr	0.87	1.88	1.63	4.31	2.25	1.15	2.57	3.94	2.59	1.01	3.95	2.39	2.98	3.19	2.52	0.97
Nd	4.4	8.8	9.4	17.4	9.9	6.9	12.3	16.7	11.2	5.8	16.3	12.5	14.2	14.7	12.8	5.5
Sm	1.42	2.53	2.6	3.46	2.8	2	3.17	3.87	2.82	1.83	3.78	3.76	3.7	4.1	3.57	1.69
Eu	0.56	0.91	1.09	0.96	0.94	0.68	0.96	0.94	0.92	0.7	1.04	1.27	1.18	1.24	1.11	0.47
Gd	2.26	3.31	3.81	3.72	2.8	2.79	3.27	3.91	3.03	2.39	4.37	4.15	4.43	4.59	4.3	2.35
Tb	0.4	0.52	0.67	0.56	0.48	0.51	0.56	0.59	0.5	0.43	0.67	0.69	0.69	0.77	0.72	0.41
Dy	2.7	3.52	4.35	3.64	3.19	3.07	3.42	3.52	2.85	2.77	3.9	4.26	4.2	4.83	4.84	2.69
Ho	0.56	0.73	0.94	0.73	0.56	0.65	0.74	0.72	0.64	0.55	0.89	0.93	0.85	1.04	0.93	0.62
Er	1.75	1.93	2.77	2.03	1.77	2.06	2.12	2.38	1.76	1.72	2.4	2.65	2.52	2.79	2.75	1.73
Tm	0.24	0.34	0.42	0.36	0.24	0.3	0.29	0.34	0.25	0.24	0.38	0.4	0.36	0.43	0.39	0.27
Yb	1.64	1.98	2.97	2.24	1.62	2.15	2.11	2.45	1.81	1.62	2.4	2.3	2.37	2.63	2.61	1.8
Lu	0.27	0.3	0.46	0.32	0.26	0.36	0.32	0.32	0.28	0.28	0.38	0.36	0.39	0.41	0.42	0.29
Eu/Eu*	0.955805	0.961495	1.05891	0.818166	1.02648	0.88018	0.911691	0.738863	0.962325	1.02342	0.782396	0.983027	0.891167	0.873984	0.866233	0.721108
Th/U	2	3	1	3.92857	0.25	3	3.8	3.71429	2.71429	2	3.14286	2	3	2.83333	1	2
